# Supplementary material for: Systematic Review and Meta‐analysis of Enhanced Recovery After Pancreatic Surgery with Particular Emphasis on Pancreaticoduodenectomies
Source: Springer Nature journal article supplement (doi:10.1007/s00268-013-2044-3), 2013-04-08
Supplement: MOESM1 [file 8258688]

**Supplementary table: Summary of ERAS elements included in study**

| **Study** | **Preoperative** | | | | | **Perioperative** | | | | | | **Postoperative** | | | | | | | |
| --- | --- | --- | --- | --- | --- | --- | --- | --- | --- | --- | --- | --- | --- | --- | --- | --- | --- | --- | --- |
| Pre-op counseling | Pre-op feeding | No premed | No bowel preparation | Thrombo embolic prophylaxis | Peri-  operative antibiotics | Epidural analgesia | PCA | Fluid restriction | Prevention of hypothermia | PPI | Early oral feeding (from POD) | Removal NG tube POD 1 | Moblisation from POD 1 | Octreotide | Antiemetics | Standard laxatives | Early Removal bladder catheter | Early Removal drains |
| Balzano et al. 200839 | x |  |  |  | x | x | x |  | x |  |  | x (4) |  | x | x | x |  |  |  |
| Porter et al. 200040 | x |  |  |  | x | x | x |  |  |  |  | X (?) | x | x |  |  |  | x | x |
| Kennedy et al. 200943 | x |  |  | x | x | x |  | x | x |  | x | x (3) | x | x |  |  |  | x | x |
| Vanounou et al. 200726 | x |  | x | x | x | x | x | x | x | x | x | X (2) | x | x | x |  | x | x | x |
| Kennedy et al. 200741 | x |  |  | x | x | x |  | x | x |  | x | x (3) | x | x | x |  |  | x | x |
| DiSebastiano et al. 201044 |  | x | x |  | x | x |  | x | x | x | x | x (2) | x | x |  | x | x | x |  |
| Berberat et al. 200745 |  |  |  |  | x | x | x | x |  | x |  | X (1) | x | x | x | x | x | x | x |
| Robertson et al. 201242 |  |  |  |  | x |  | x | x | x |  | x | x (4) | x | x | x | x |  | x | x |
